Urol Int 2024;108:276  
DOI: 10.1159/000538663

Published online: April 18, 2024

In the article entitled “Extramammary Paget’s Disease of the Scrotal and Penile: A Case Report and Review of the Literature” [Urol Int. 2024; DOI: 10.1159/000538663] by Yang et. al., the third affiliation was incorrectly given. The correct affiliation is as follows:

Department of Urology, Ruijin-Hainan Hospital Shanghai Jiao Tong University School of Medicine, Qionghai, China

The original article has been corrected.
